# Supplementary material for: Evidence for a major missing source in the global chloromethane budget from stable carbon isotopes
Source: Copernicus journal article supplement (doi:10.5194/acp-2018-855), 2018-09-11
Supplement: Supplementary file [file acp-2018-855-AC4-supplement.pdf]

We would like to thank J. Laube for this comment that inspired some further thoughts on the missing CH<sub>3</sub>Cl source

Increased anthropogenic emissions (Li et al., 2017) may to some extent help to close the CH<sub>3</sub>Cl budget. From a purely isotopic perspective, they would fit into the picture and in conjunction with the Central East Asian outflow (Oram et al., 2017), they might appear as tropical emissions. But, this further requires a careful evaluation of increased anthropogenic emissions with respect to the interhemispheric distribution of the CH<sub>3</sub>Cl sources. The lack of a substantial interhemispheric gradient in annual mean mixing ratios (Rassmussen, 1980; Simmonds et al. 2004) along with a small interhemispheric gradient in the annual mean OH mixing ratio implies a quite even interhemispheric distribution of the CH<sub>3</sub>Cl sources. In line with previous model studies (Yoshida et al, 2006; Xiao et al., 2010 we assumed NH:SH ratio of 1.25 in our model. A substantial increase of the anthropogenic emissions, mainly showing up in the northern hemisphere, would require an adjustment of the interhemispheric ratio of the other sources and or the sinks.

There are other sources and formation processes, being worth to be (re)-evaluated with respect to the missing CH<sub>3</sub>Cl emissions.

In the 2014 WMO Ozone Assessment (Carpenter et al. 2014) the CH<sub>3</sub>Cl emissions from biomass burning have been revised downward. On the other hand two recent studies (Santee et al., 2013; Umezawa et al., 2014) have shown that enhanced levels of CH<sub>3</sub>Cl in the upper troposphere can often be attributed to biomass burning and highlighted the importance of the CH<sub>3</sub>Cl biomass burning source. . Hence a careful revision of the biomass burning source may help to reduce the gap between CH<sub>3</sub>Cl sinks and sources.

Keppler et al. (2000) reported on the iron catalyzed formation of CH<sub>3</sub>Cl from methoxy phenols of soil organic matter. While organic rich peat lands have long been recognized as a source for CH<sub>3</sub>Cl (Dimmer et al., 2001), soils in general have been considered as a net sink for CH<sub>3</sub>Cl but with highly variable gross emission and deposition fluxes. A recent study has shown remarkable net emissions of  $77 \pm 2.8 \mu\text{g m}^{-2}\text{d}^{-1}$  from organic rich temperate forest soils (Redeker et al. 2012). In addition substantial production of CH<sub>3</sub>Cl has also been demonstrated for hypersaline soils (Kotte et al. 2012). Manley et al. (2006) reported average fluxes of  $3960 \text{ nmol m}^{-2}\text{d}^{-1}$  from bare saltmarsh soils. Thus on a global scale, soils may probably turn from a net sink to a net source.

Moore (2008) proposed a photochemical production pathway for CH<sub>3</sub>Cl in saline waters from methoxy phenols. The reaction comprises the photochemical cleavage of the aromatic ring system followed by a nucleophilic substitution with chloride. This mechanism might explain strongly enhanced CH<sub>3</sub>Cl concentrations of up to 2 nmol L<sup>-1</sup> reported from European estuaries (Christoph et al. 2002). With the vast amounts of DOC exported by the large tropical rivers this source may become significant on a global scale.

Methoxyphenols as well as chloride are widespread in the environment. The photochemical mechanism proposed by Moore (2008) may also be relevant for saline surface soils (see above). Further, phenols and methoxy phenols can contribute to 20–40 % of particulate mass from burning hardwood and softwood (Hawthorne et al., 1989). Given this, the photochemical production pathway proposed by Moore (2008) may also be relevant with respect to biomass burning aerosols. Notably, such a mechanism could also take place for quite some time after the burning event in aged biomass burning plumes and in particular after mixing with sea salt aerosols.

## References

- Carpenter, L. J., Reimann, S., Burkholder, J. B., Clerbaux, C., Hall, B., Hossaini, R., Laube, J., and Yvon-Lewis, S.: Chapter 1: Update on Ozone-Depleting Substances (ODSs) and Other Gases of Interest to the Montreal Protocol, in: Scientific Assessment of Ozone Depletion, Global Ozone Research and Monitoring Project Report, World Meteorological Organization (WMO), 21– 125, 2014.
- Christof, O., Seifert, R., and Michaelis, W. (2002): Volatile halogenated organic compounds in European estuaries, *Biogeochemistry*, 59, 143-160, doi: 10.1023/a:1015592115435
- Dimmer, C. H., Simmonds, P. G., Nickless, G., and Bassford, M. R. (2001): Biogenic fluxes of halomethanes from Irish peatland ecosystems, *Atmospheric Environment*, 35, 321-330, doi: 10.1016/s1352-2310(00)00151-5.
- Hawthorne, S. B., Krieger, M. S., Miller, D. J., and Mathiason, M. B.: Collection and quantitation of methoxylated phenol tracers for atmospheric-pollution from residential wood stoves, *Environ. Sci. Technol.*, 23, 470–475, (1989)
- Keppler, F., Eiden, R., Niedan, V., Pracht, J., and Schöler, H. F. (2000): Halocarbons produced by natural oxidation processes during degradation of organic matter, *Nature*, 403, 298-301, doi: 10.1038/35002055.
- Kotte, K., Löw, F., Huber, S. G., Krause, T., Mulder, I., and Schöler, H. F.: Organohalogen emissions from saline environments spatial extrapolation using remote sensing as most promising tool, *Biogeosciences*, 9, 1225-1235, 10.5194/bg-9-1225-2012, 2012.

Li, S., Park, M.-K., Jo, C. O., and Park, S.: Emission estimates of methyl chloride from industrial sources in China based on high frequency atmospheric observations, *Journal of Atmospheric Chemistry*, 74, 227-243, 10.1007/s10874-016-9354-4, 2017.

Manley, S. L., Wang, N.-Y., Walser, M. L., and Cicerone, R. J.: Coastal salt marshes as global methyl halide sources from determinations of intrinsic production by marsh plants, *Global Biogeochemical Cycles*, 20, GB3015, doi: 10.1029/2005gb002578, (2006).

Moore, R. M.: A photochemical source of methyl chloride in saline waters, *Environmental Science & Technology*, 42, 1933 – 1937, doi: 10.1021/es071920I, (2008).

Oram, D. E., Ashfold, M. J., Laube, J. C., Gooch, L. J., Humphrey, S., Sturges, W. T., Leedham-Elvidge, E., Forster, G. L., Harris, N. R. P., Mead, M. I., Samah, A. A., Phang, S. M., Ou-Yang, C. F., Lin, N. H., Wang, J. L., Baker, A. K., Brenninkmeijer, C. A. M., and Sherry, D.: A growing threat to the ozone layer from short-lived anthropogenic chlorocarbons, *Atmos. Chem. Phys.*, 17, 11929-11941, 10.5194/acp-17-11929-2017, 2017.

Rassmussen, R.A., L. E. Rassmussen, . Khalil, A.K., Dalluge, R . W., Concentration distribution of methyl chloride in the atmosphere. *J. Geophys. Res.* 85: 7350-7356, 1980.

Santee, M. L., Livesey, N. J., Manney, G. L., Lambert, A., and Read, W. G.: Methyl chloride from the Aura Microwave Limb Sounder: First global climatology and assessment of variability in the upper troposphere and stratosphere, *Journal of Geophysical Research: Atmospheres*, 118, 13,532-513,560, doi:10.1002/2013JD020235, 2013.

Simmonds, P. G. et al. AGAGE Observations of methyl bromide and methyl chloride at Mace Head, Ireland, and Cape Grim, Tasmania, 1998–2001. *Journal of Atmospheric Chemistry* 47, 243-269, doi:10.1023/B:JOCH.0000021136.52340.9c (2004).

Yoshida, Y., Wang, Y., Shim, C., Cunnold, D., Blake, D. R., and Dutton, G. S.: Inverse modeling of the global methyl chloride sources, *Journal of Geophysical Research: Atmospheres*, 111, doi:10.1029/2005JD006696, 2006.

Umezawa, T., Baker, A. K., Oram, D., Sauvage, C., O'Sullivan, D., Rauthe-Schöch, A., Montzka, S. A., Zahn, A., and Brenninkmeijer, C. A. M.: Methyl chloride in the upper troposphere observed by the CARIBIC passenger aircraft observatory: Large-scale distributions and Asian summer monsoon outflow, *Journal of Geophysical Research: Atmospheres*, 119, 5542-5558, doi:10.1002/2013JD021396, 2014.

Xiao, X., Prinn, R. G., Fraser, P. J., Weiss, R. F., Simmonds, P. G., O'Doherty, S., Miller, B. R., Salameh, P. K., Harth, C. M., Krummel, P. B., Golombek, A., Porter, L. W., Butler, J. H., Elkins, J. W., Dutton, G. S., Hall, B. D., Steele, L. P., Wang, R. H. J., and Cunnold, D. M.: Atmospheric three-dimensional inverse modeling of regional industrial emissions and global oceanic uptake of carbon tetrachloride, *Atmos. Chem. Phys.*, 10, 10421-10434, 10.5194/acp-10-10421-2010, 2010.
